# Supplementary material for: A phytic acid-based CoMn bimetallic metal–organic aerogel (PA–CoMn-1 : x : 2 − x ) as a modifier for electrochemical detection of non-steroidal anti-inflammatory drug 4-acetaminophenol
Source: Royal Society of Chemistry journal article supplement (doi:10.1039/d4ra04012k), 2024-01-01
Supplement: d4ra04012k1.pdf [file d4ra04012k1.pdf]

## Supporting information

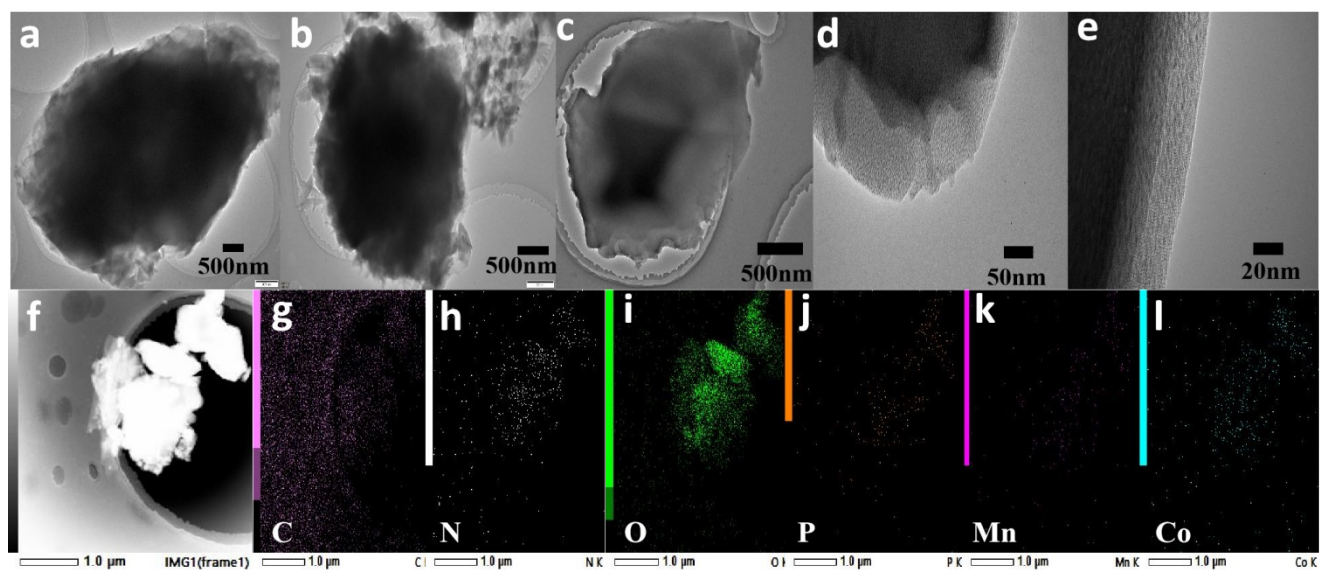

**Fig.S1** TEM images of PA-Co-1:2@800(a), PA-Mn-1:2@800(b), PA-CoMn-1:1.5:0.5@800(c,d, and e) aerogel and mapping images (Co, Mn, P, O and C) (g~i).
